# Supplementary material
Source: publisher site journal article supplement (https://www.dovepress.com/article/262019)
Supplement: Supplementary file 1 [file get_supplementary_file.php]

Table S1 .Primers used in this study for SYBR Green qPCR reactions.

| **Species** | **Primer sequence5`-3`** | **Annealing temperature(◦C)** | **Amplified fragment(bp)** |
| --- | --- | --- | --- |
| *E.coli* | F- GTTAATACCTTTGCTCATTGA  R- ACCAGGGTATCTAATCCTGTT | 52 | 340 |
| *Lactobacillus* spp. | F- AGCAGTAGGGAATCTTCCA  R- CACCGCTACACATGGAG | 50 | 341 |
| *Bacteroides* spp. | F- ATAGCCTTTCGAAAGRAAGAT  R- CCAGTATCAACTGCAATTTTA | 50 | 495 |
| *Bifidobacterium* spp. | F- GGGTGGTAATGCCGGATG  R- TAAGCGATGGACTTTCACACC | 55 | 442 |
| *Clostridium* IV | F- CCTTCCGTGCCGSAGTTA  R- GAATTAAACCACATACTCCACTGCTT | 60 | 115 |
| *F. prausnitzii* | F- GATGGCCTCGCGTCCGATTAG  R- CCGAAGACCTTCTTCCTCC | 58 | 198 |
| *A. muciniphila* | F- CAGCACGTGAAGGTGGGGAC  R- CCTTGCGGTTGGCTTCAGAT | 65 | 329 |
| *Klebsiella spp.* | F- ACGGCCGAATATGACGAATTC  R- AGAGTGATCTGCTCATGAA | 55 | 68 |
| *Enterococcus* spp. | F- CCCTTAATTGTTAGTTGCCATCATT  R- ACTCGTTGTACTTCCCATTGT | 56 | 144 |
| *Prevotella* spp. | F- CAGCAGCCGCGGTAATA  R- GGCATCCATCGTTTACCGT | 54 | 309 |

**Fig S1.** Heat map showing the distribution and abundance of members of the studied bacteria (in rows) within the different CDI patients, samples (in columns).

|  | PA0  132 | PA0  149 | PA0  164 | PA0  169 | PA0  186 | PA0  201 | PA0  227 | PA0  243 | PA0  247 | PA0  255 | PA0  263 | PA0  271 | PA0  331 | PA0  342 | PA0  344 | PA0  350 | PA0  384 | PA0  387 | PA0  398 | PA0  416 | PA0  421 | PA0  448 | PA0  465 | PA0  472 | PA0  547 | PA0  553 | PA0  561 | PA0  594 |
| --- | --- | --- | --- | --- | --- | --- | --- | --- | --- | --- | --- | --- | --- | --- | --- | --- | --- | --- | --- | --- | --- | --- | --- | --- | --- | --- | --- | --- |
| *E. coli* |  |  |  |  |  |  |  |  |  |  |  |  |  |  |  |  |  |  |  |  |  |  |  |  |  |  |  |  |
| *Lactobacillus* spp. |  |  |  |  |  |  |  |  |  |  |  |  |  |  |  |  |  |  |  |  |  |  |  |  |  |  |  |  |
| *Bacteroides* spp. |  |  |  |  |  |  |  |  |  |  |  |  |  |  |  |  |  |  |  |  |  |  |  |  |  |  |  |  |
| *Clostridium* IV |  |  |  |  |  |  |  |  |  |  |  |  |  |  |  |  |  |  |  |  |  |  |  |  |  |  |  |  |
| *Bifidobacterium* spp. |  |  |  |  |  |  |  |  |  |  |  |  |  |  |  |  |  |  |  |  |  |  |  |  |  |  |  |  |
| *F.prausnitzii* |  |  |  |  |  |  |  |  |  |  |  |  |  |  |  |  |  |  |  |  |  |  |  |  |  |  |  |  |
| *A. muciniphila* |  |  |  |  |  |  |  |  |  |  |  |  |  |  |  |  |  |  |  |  |  |  |  |  |  |  |  |  |
| *Klebsiella* spp. |  |  |  |  |  |  |  |  |  |  |  |  |  |  |  |  |  |  |  |  |  |  |  |  |  |  |  |  |
| *Enterococcus* spp. |  |  |  |  |  |  |  |  |  |  |  |  |  |  |  |  |  |  |  |  |  |  |  |  |  |  |  |  |
| *Prevotella* spp. |  |  |  |  |  |  |  |  |  |  |  |  |  |  |  |  |  |  |  |  |  |  |  |  |  |  |  |  |
